# Supplementary material for: Competitive interactions between methane- and ammonia-oxidizing bacteria modulate carbon and nitrogen cycling in paddy soil
Source: Copernicus journal article supplement (doi:10.5194/bg-11-3353-2014), 2014-06-24
Supplement: Supplementary file 1 [file bg-11-3353-2014-supplement.pdf]

Supplement of Biogeosciences, 11, 3353–3368, 2014  
<http://www.biogeosciences.net/11/3353/2014/>  
doi:10.5194/bg-11-3353-2014-supplement  
© Author(s) 2014. CC Attribution 3.0 License.

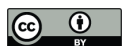

*Supplement of*

## **Competitive interactions between methane- and ammonia-oxidizing bacteria modulate carbon and nitrogen cycling in paddy soil**

**Y. Zheng et al.**

*Correspondence to:* Z. J. Jia (jia@issas.ac.cn)

## **Supplemental Material for**

Competitive interactions between methane- and ammonia oxidizing bacteria modulate carbon and nitrogen cycling in paddy soil

Yan Zheng<sup>1,2</sup>, Rong Huang<sup>1</sup>, Baozhan Wang<sup>1</sup>, Paul L.E. Bodelier<sup>3</sup>, Zhongjun Jia<sup>1\*</sup>

### Author Affiliation

<sup>1</sup> State Key Laboratory of Soil and Sustainable Agriculture,  
Institute of Soil Science, Chinese Academy of Sciences,  
Nanjing, 210008, Jiangsu Province, China

<sup>2</sup> University of the Chinese Academy of Sciences,  
Beijing, 100049, China

<sup>3</sup> Netherlands Institute of Ecology (NIOO-KNAW),  
Department of Microbial Ecology,  
Droevendaalsesteeg 10,  
6708 PB, Wageningen, the Netherlands

### Corresponding author\*

Zhongjun Jia

E-mail: jia@issas.ac.cn

Institute of Soil Science, Chinese Academy of Sciences, China

### **This file includes:**

Supplemental Table S1 to S6

Supplemental Figure S1 to S8

Supplemental Reference

1 **Table S1.** The scenario of SIP microcosm construction over the course of 19 days of incubation

| Treatment                   | <sup>13</sup> C-CH <sub>4</sub>                                                                                                                        | <sup>13</sup> C-Urea | <sup>13</sup> C-CH <sub>4</sub> +Urea | <sup>12</sup> C-CH <sub>4</sub> +Urea | <sup>13</sup> C-CH <sub>4</sub>                       | <sup>13</sup> C-Urea | <sup>13</sup> C-CH <sub>4</sub> +Urea | <sup>12</sup> C-CH <sub>4</sub> +Urea | <sup>13</sup> C-CH <sub>4</sub>           | <sup>13</sup> C-Urea | <sup>13</sup> C-CH <sub>4</sub> +Urea | <sup>12</sup> C-CH <sub>4</sub> +Urea |
|-----------------------------|--------------------------------------------------------------------------------------------------------------------------------------------------------|----------------------|---------------------------------------|---------------------------------------|-------------------------------------------------------|----------------------|---------------------------------------|---------------------------------------|-------------------------------------------|----------------------|---------------------------------------|---------------------------------------|
|                             | CH <sub>4</sub> added (ppmv) <sup>*</sup>                                                                                                              |                      |                                       |                                       | Urea added (μg N g <sup>-1</sup> d.w.s.) <sup>*</sup> |                      |                                       |                                       | CO <sub>2</sub> added (ppmv) <sup>*</sup> |                      |                                       |                                       |
| Day-0 -18:00pm <sup>†</sup> | 9460                                                                                                                                                   | ---                  | 9322                                  | 9035                                  | ---                                                   | 100                  | 100                                   | 100                                   | ---                                       | 50000                | 50000                                 | 50000                                 |
| Day-5- 8:00 <sup>‡</sup>    | The destructive sampling performed and the remaining microcosms were flushed with pressurized synthetic air (20% O <sub>2</sub> , 80% N <sub>2</sub> ) |                      |                                       |                                       |                                                       |                      |                                       |                                       |                                           |                      |                                       |                                       |
| Day-5-18:00 pm              | 6114                                                                                                                                                   | ---                  | 7770                                  | 6821                                  | ---                                                   | 100                  | 100                                   | 100                                   | ---                                       | 50000                | 50000                                 | 50000                                 |
| Day-7-18:00 pm              | 7946                                                                                                                                                   | ---                  | 8020                                  | 6362                                  | ---                                                   | ---                  | ---                                   | ---                                   | ---                                       | ---                  | ---                                   | ---                                   |
| Day-8-20:00 pm              | 8355                                                                                                                                                   | ---                  | 8018                                  | 8482                                  | ---                                                   | ---                  | ---                                   | ---                                   | ---                                       | ---                  | ---                                   | ---                                   |
| Day-9-18:00 pm              | ---                                                                                                                                                    | ---                  | 6755                                  | 7067                                  | ---                                                   | ---                  | ---                                   | ---                                   | ---                                       | ---                  | ---                                   | ---                                   |
| Day-10-10:00am              | ---                                                                                                                                                    | ---                  | 6201                                  | 6718                                  | ---                                                   | ---                  | ---                                   | ---                                   | ---                                       | ---                  | ---                                   | ---                                   |
| Day-10-18:00 pm             | ---                                                                                                                                                    | ---                  | 9766                                  | 9552                                  | ---                                                   | ---                  | ---                                   | ---                                   | ---                                       | ---                  | ---                                   | ---                                   |
| Day-11-10:00am              | ---                                                                                                                                                    | ---                  | 9113                                  | 9164                                  | ---                                                   | ---                  | ---                                   | ---                                   | ---                                       | ---                  | ---                                   | ---                                   |
| Day-11-20:00 pm             | ---                                                                                                                                                    | ---                  | 9229                                  | 9541                                  | ---                                                   | ---                  | ---                                   | ---                                   | ---                                       | ---                  | ---                                   | ---                                   |
| Day-12-10:00am <sup>‡</sup> | The microcosms were flushed with pressurized synthetic air (20% O <sub>2</sub> , 80% N <sub>2</sub> ).                                                 |                      |                                       |                                       |                                                       |                      |                                       |                                       |                                           |                      |                                       |                                       |
| Day-12-21:00pm              | 18947                                                                                                                                                  | ---                  | 16081                                 | 15720                                 | ---                                                   | 100                  | 100                                   | 100                                   | ---                                       | 50000                | 50000                                 | 50000                                 |
| Day-14-11:00am              | ---                                                                                                                                                    | ---                  | 11724                                 | 14355                                 | ---                                                   | ---                  | ---                                   | ---                                   | ---                                       | ---                  | ---                                   | ---                                   |
| Day-14-21:00pm              | ---                                                                                                                                                    | ---                  | 11762                                 | 12491                                 | ---                                                   | ---                  | ---                                   | ---                                   | ---                                       | ---                  | ---                                   | ---                                   |
| Day-15-11:00pm              | ---                                                                                                                                                    | ---                  | 8678                                  | 10431                                 | ---                                                   | ---                  | ---                                   | ---                                   | ---                                       | ---                  | ---                                   | ---                                   |
| Day-15-21:00pm              | ---                                                                                                                                                    | ---                  | 9591                                  | 11225                                 | ---                                                   | ---                  | ---                                   | ---                                   | ---                                       | ---                  | ---                                   | ---                                   |
| Day-16-11:00pm              | ---                                                                                                                                                    | ---                  | 17923                                 | 18598                                 | ---                                                   | ---                  | ---                                   | ---                                   | ---                                       | ---                  | ---                                   | ---                                   |
| Day-16-21:00pm              | ---                                                                                                                                                    | ---                  | 18190                                 | 17706                                 | ---                                                   | ---                  | ---                                   | ---                                   | ---                                       | ---                  | ---                                   | ---                                   |
| Day-17-11:00am              | ---                                                                                                                                                    | ---                  | 8792                                  | 10788                                 | ---                                                   | ---                  | ---                                   | ---                                   | ---                                       | ---                  | ---                                   | ---                                   |
| Day-17-21:00pm              | ---                                                                                                                                                    | ---                  | 17533                                 | 15901                                 | ---                                                   | ---                  | ---                                   | ---                                   | ---                                       | ---                  | ---                                   | ---                                   |
| Day-18-11:00am              | ---                                                                                                                                                    | ---                  | 10286                                 | 10430                                 | ---                                                   | ---                  | ---                                   | ---                                   | ---                                       | ---                  | ---                                   | ---                                   |
| Day-18-21:00pm              | ---                                                                                                                                                    | ---                  | 11928                                 | 12638                                 | ---                                                   | ---                  | ---                                   | ---                                   | ---                                       | ---                  | ---                                   | ---                                   |
| Day-19-11:00am              | The destructive sampling performed.                                                                                                                    |                      |                                       |                                       |                                                       |                      |                                       |                                       |                                           |                      |                                       |                                       |

2 <sup>\*</sup> The amount of substrate added to microcosms. The <sup>13</sup>C and <sup>12</sup>C-substrates were used for labeled and control microcosms, respectively.

3 <sup>†</sup> The timing of substrate added to microcosms, and the numbers in brackets indicate the time of day.

4 <sup>‡</sup> The date of SIP microcosms were flushed with pressurized synthetic air (20% O<sub>2</sub>, 80% N<sub>2</sub>), and subsequently amended with fresh substrate.

5 --- No substrate added

6 **Table S2.** Primers and PCR conditions used in this study

| Primer name | primer sequence(5'-3') | Targeted gene              | Thermal Profile                                                                                                                       | Molecular analysis | Reference                                          |
|-------------|------------------------|----------------------------|---------------------------------------------------------------------------------------------------------------------------------------|--------------------|----------------------------------------------------|
| 515F        | CCAGCMGCCGCGG          | 16S rRNA gene              | 95°C,3.0min;30×(95°C,30s; 55°C, 30s;72°C, 45s);72°C,10min                                                                             | Pyrosequencing     | (Xia et al., 2011)                                 |
| 907R        | CCGTCAATTCMTTTRAGTTT   |                            |                                                                                                                                       |                    |                                                    |
| A189F       | GGNGACTGGGACTTCTGG     | <i>pmoA</i> gene           | 95°C,3.0min;40×(95°C,10s; 55°C, 30s;72°C, 30s; 80°C 5s; with plate read); melt curve 65°C to 95°C, incremental0.5°C, 0:05+plate read  | Real-time PCR      | (Costello and Lidstrom, 1999; Holmes et al., 1995) |
| mb661r      | CCGGMGCAACGTCYTTACC    |                            | 95°C,3.0min;30×(95°C,30s; 55°C, 30s;72°C, 45s); 72°C,10min                                                                            | Pyrosequencing     |                                                    |
| amoA-1F     | GGGGTTTCTACTGGTGGT     | bacterial <i>amoA</i> gene | 95°C,3.0min;40×(95°C,10s; 55°C, 30s;72°C, 30s; with plate read); melt curve 65°C to 95°C, incremental 0.5°C, 0:05+plate read          | Real-time PCR      | (Rotthauwe et al., 1997)                           |
| amoA-2R     | CCCCTCGGGAAAGCCTTCTTC  |                            | 95°C,3.0min;30×(95°C,30s; 55°C, 30s;72°C, 45s); 72°C,10min                                                                            | Pyrosequencing     |                                                    |
| Arch-amoAF  | STAATGGTCTGGCTTAGACG   | Archaeal <i>amoA</i> gene  | 95°C,10.0min;40×(95°C,30s; 55°C, 45s;72°C, 30s;82°C 15s with plate read); melt curve 65°C to 95°C, incremental 1.0°C, 0:05+plate read | Real-time PCR      | (Francis et al., 2005)                             |
| Arch-amoAR  | GCGGCCATCCATCTGTATGT   |                            |                                                                                                                                       |                    |                                                    |

7 **Table S3.** Pyrosequencing summary of the total microbial communities in SIP  
 8 microcosms using the universal primers 515F-907R of the total 16S rRNA genes

| Treatment*  |                                          | Pyrosequencing reads number† |              |             |              |             |
|-------------|------------------------------------------|------------------------------|--------------|-------------|--------------|-------------|
|             |                                          | High-quality read number     | Bacteria     | Archaea     | MOB          | AOB         |
| Zero time   | Zero Time-R1                             | 9519                         | 9218(96.8%)  | 290(3.05%)  | 28 (0.29%)   | 22 (0.23%)  |
|             | Zero Time-R2                             | 9110                         | 8775(96.3%)  | 327(3.59)   | 26 (0.29%)   | 16 (0.18%)  |
|             | Zero Time-R3                             | 9369                         | 9082(96.9%)  | 276(2.95)   | 24 (0.26%)   | 22 (0.23%)  |
| Day-5       | <sup>13</sup> C-CH <sub>4</sub> -R1      | 7758                         | 7593(97.9%)  | 160(2.06%)  | 1252 (16.1%) | 12 (0.15%)  |
|             | <sup>13</sup> C-CH <sub>4</sub> -R2      | 8630                         | 8381(97.1%)  | 244(2.83%)  | 1273 (13.5%) | 16 (0.19%)  |
|             | <sup>13</sup> C-CH <sub>4</sub> -R3      | 8829                         | 8626(97.7%)  | 202(2.29%)  | 1192 (13.5%) | 18 (0.20%)  |
|             | <sup>13</sup> C-Urea-R1                  | 7803                         | 7525(96.4%)  | 273(3.50%)  | 31 (0.40%)   | 10 (0.13%)  |
|             | <sup>13</sup> C-Urea-R2                  | 7807                         | 7607(97.4%)  | 199(2.55%)  | 13 (0.17%)   | 26 (0.33%)  |
|             | <sup>13</sup> C-Urea-R3                  | 6541                         | 6372(97.4%)  | 167(2.55%)  | 17 (0.26%)   | 24 (0.37%)  |
|             | <sup>13</sup> C-CH <sub>4</sub> +Urea-R1 | 7431                         | 7290(98.1%)  | 138(1.86%)  | 1637 (22.0%) | 15 (0.20%)  |
|             | <sup>13</sup> C-CH <sub>4</sub> +Urea-R2 | 8372                         | 8210(98.1%)  | 157(1.88%)  | 1633 (19.5%) | 30 (0.36%)  |
|             | <sup>13</sup> C-CH <sub>4</sub> +Urea-R3 | 7568                         | 7435(98.2%)  | 129(1.70%)  | 1559 (20.6%) | 22 (0.29%)  |
|             | <sup>12</sup> C-CH <sub>4</sub> +Urea-R1 | 6995                         | 6826(97.6%)  | 166(2.37%)  | 1109 (15.9%) | 9 (0.13%)   |
|             | <sup>12</sup> C-CH <sub>4</sub> +Urea-R2 | 8083                         | 7944(98.3%)  | 133(1.65%)  | 1782 (22.1%) | 12 (0.15%)  |
|             | <sup>12</sup> C-CH <sub>4</sub> +Urea-R3 | 7809                         | 7648(97.9%)  | 157(2.01%)  | 1433 (18.4%) | 11 (0.14%)  |
| Day-19      | <sup>13</sup> C-CH <sub>4</sub> -R1      | 10104                        | 9821(97.2%)  | 274(2.71%)  | 640 (6.33%)  | 18 (0.18%)  |
|             | <sup>13</sup> C-CH <sub>4</sub> -R2      | 41172                        | 40101(97.4%) | 1045(2.54%) | 3330 (8.09%) | 86 (0.21%)  |
|             | <sup>13</sup> C-CH <sub>4</sub> -R3      | 41230                        | 40426(98.0%) | 788(1.91%)  | 3235 (7.85%) | 104 (0.25%) |
|             | <sup>13</sup> C-Urea-R1                  | 8294                         | 7907(95.3%)  | 375(4.52%)  | 23 (0.28%)   | 26 (0.31%)  |
|             | <sup>13</sup> C-Urea-R2                  | 31675                        | 30450(96.1%) | 1205(3.80%) | 110 (0.35%)  | 125 (0.39%) |
|             | <sup>13</sup> C-Urea-R3                  | 44313                        | 43117(97.3%) | 1181(2.67%) | 129 (0.29%)  | 149 (0.34%) |
|             | <sup>13</sup> C-CH <sub>4</sub> +Urea-R1 | 10370                        | 10245(98.8%) | 122(1.18%)  | 2961 (28.6%) | 12 (0.12%)  |
|             | <sup>13</sup> C-CH <sub>4</sub> +Urea-R2 | 7309                         | 7190(98.4%)  | 118(1.61%)  | 1963 (26.9%) | 7 (0.10%)   |
|             | <sup>13</sup> C-CH <sub>4</sub> +Urea-R3 | 6494                         | 6402(98.6%)  | 91(1.40%)   | 1955 (30.1%) | 15 (0.23%)  |
|             | <sup>12</sup> C-CH <sub>4</sub> +Urea-R1 | 9485                         | 9299(98.0%)  | 183(1.93%)  | 2672 (28.2%) | 13 (0.14%)  |
|             | <sup>12</sup> C-CH <sub>4</sub> +Urea-R2 | 7695                         | 7595(98.7%)  | 96(1.25%)   | 2129 (27.7%) | 9 (0.12%)   |
|             | <sup>12</sup> C-CH <sub>4</sub> +Urea-R3 | 6663                         | 6573(98.6%)  | 85(1.28%)   | 1750 (26.3%) | 13 (0.20%)  |
| Average     |                                          | 12831                        |              |             |              |             |
| Total reads |                                          | 346428                       | 337658       | 8581        |              |             |

9 \*: The designation of R1 to R3 represents triplicate microcosm incubations.

10 †: The value in parentheses represents the percentage of the targeted 16S rRNA phylotype reads to  
 11 total 16S rRNA gene sequence reads in each microcosm.

12 --- Not detected

13 **Table S4.** Pyrosequencing summary of the total microbial communities in the fractionated DNA by isopycnic centrifugation of total DNA  
 14 extracted from SIP microcosms using the universal primers 515F-907R of the total 16S rRNA genes

| DNA gradient<br>fraction* | High-quality reads number       |                      |                                       |                                       |                                 |                      |                                       |                                       |
|---------------------------|---------------------------------|----------------------|---------------------------------------|---------------------------------------|---------------------------------|----------------------|---------------------------------------|---------------------------------------|
|                           | Day-5                           |                      |                                       |                                       | Day-19                          |                      |                                       |                                       |
|                           | <sup>13</sup> C-CH <sub>4</sub> | <sup>13</sup> C-Urea | <sup>13</sup> C-CH <sub>4</sub> +Urea | <sup>12</sup> C-CH <sub>4</sub> +Urea | <sup>13</sup> C-CH <sub>4</sub> | <sup>13</sup> C-Urea | <sup>13</sup> C-CH <sub>4</sub> +Urea | <sup>12</sup> C-CH <sub>4</sub> +Urea |
| Fraction-13               | 39                              | 107                  | 4240                                  | 4593                                  | 4488                            | 1384                 | 5859                                  | 6410                                  |
| Fraction-12               | 5134                            | 4677                 | 3861                                  | 5387                                  | 7446                            | 3318                 | 8093                                  | 8171                                  |
| Fraction-11               | 4318                            | 4658                 | 3615                                  | 6492                                  | 6046                            | 6916                 | 7277                                  | 5441                                  |
| Fraction-10               | 3227                            | 4531                 | 4941                                  | 5556                                  | 3682                            | 6224                 | 2472                                  | 6090                                  |
| Fraction-9                | 4647                            | 4710                 | 5583                                  | 6323                                  | 6149                            | 6102                 | 4542                                  | 3867                                  |
| Fraction-8                | 6195                            | 5239                 | 5534                                  | 4925                                  | 4108                            | 6825                 | 7147                                  | 8140                                  |
| Fraction-7                | 8080                            | 6620                 | 3796                                  | 7488                                  | 5079                            | 5527                 | 6684                                  | 7118                                  |
| Fraction-6                | 5889                            | 7060                 | 3736                                  | 1925                                  | 2570                            | 3087                 | 6374                                  | 4740                                  |
| Fraction-5                | 7270                            | 3306                 | 6278                                  | 481                                   | 2134                            | 5643                 | 5804                                  | 5725                                  |
| Fraction-4                | 9622                            | 427                  | 195                                   | 931                                   | 402                             | 4526                 | 7471                                  | 9873                                  |
| Fraction-3                | ---                             | ---                  | ---                                   | ---                                   | 5568                            | 5644                 | 4424                                  | 1835                                  |
| Average                   | 5442                            | 4134                 | 4178                                  | 4410                                  | 4334                            | 5018                 | 6013                                  | 6128                                  |
| Subtotal                  | 54421                           | 41335                | 41779                                 | 44101                                 | 47672                           | 55196                | 66147                                 | 67410                                 |
| Total                     | 418061                          |                      |                                       |                                       |                                 |                      |                                       |                                       |

15 \*: indicates DNA gradient fractions with different buoyant densities, and the smaller the number, the heavier the fractionated DNA.

16 --- Not determined.

17 **Table S5.** Pyrosequencing summary of *pmoA* and *amoA* genes in the total DNA extract from SIP microcosms and in the <sup>13</sup>C-DNA fractions after  
 18 isopycnic centrifugation of total DNA using primer pairs A189F-mb661r and amoA1F-2R, respectively.

| Organisms*                  | Replicate | Day-19     |                                 |                      |                      |                     |                                       |                     |
|-----------------------------|-----------|------------|---------------------------------|----------------------|----------------------|---------------------|---------------------------------------|---------------------|
|                             |           | Day-0      | <sup>13</sup> C-CH <sub>4</sub> |                      | <sup>13</sup> C-Urea |                     | <sup>13</sup> C-CH <sub>4</sub> +Urea |                     |
|                             |           | Total DNA† | Total DNA†                      | <sup>13</sup> C-DNA‡ | <sup>13</sup> C-DNA  | <sup>13</sup> C-DNA | Total DNA†                            | <sup>13</sup> C-DNA |
| <i>pmoA</i> genes<br>of MOB | R1        | 4295       | 8244                            | ---                  | ---                  | ---                 | 1106                                  | ---                 |
|                             | R2        | 3129       | 5297                            | 367                  | ---                  | ---                 | 5074                                  | 6877                |
|                             | R3        | ---        | 5509                            | ---                  | ---                  | ---                 | 6073                                  | ---                 |
| <i>amoA</i> genes<br>of AOB | R1        | 5484       | ---                             | ---                  | 7572                 | ---                 | 2728                                  | ---                 |
|                             | R2        | 472        | ---                             | ---                  | 10656                | 472                 | 3262                                  | 1115                |
|                             | R3        | 6261       | ---                             | ---                  | 4832                 | ---                 | 4449                                  | ---                 |

19 \* MOB and AOB represent methane-oxidizing bacteria and ammonia-oxidizing bacteria, respectively.

20 † indicates that pyrosequencing was performed on the total DNA extract from the <sup>13</sup>C-labeled microcosms.

21 ‡ indicates that pyrosequencing was performed on the <sup>13</sup>C-DNA fraction after ultracentrifugation of total DNA extract.

22 ---Not determined

23 . **Table S6.** The estimated budget of carbon and nitrogen assimilation by methanotrophs and ammonia oxidizers in microcosms at day 19

| Treatment <sup>a</sup>                   | $\mu\text{mol CH}_4\text{-C/microcosm}^b$ |                          |                                              | $\mu\text{g urea-N/microcosm}$                       |                                                   |                 |
|------------------------------------------|-------------------------------------------|--------------------------|----------------------------------------------|------------------------------------------------------|---------------------------------------------------|-----------------|
|                                          | CH <sub>4</sub> consumed                  | CO <sub>2</sub> produced | CO <sub>2</sub> assimilated by methanotrophs | Assimilation of urea-N by methanotrophs <sup>c</sup> | Nitrate produced from urea-N by ammonia oxidizers | Urea-N recovery |
| <sup>13</sup> C-CH <sub>4</sub> +Urea-R1 | 1111                                      | 730.9                    | 380.5 (34.2%)                                | 1332 (74.0%)                                         | 364.2 (20.2%)                                     | 94.2%           |
| <sup>13</sup> C-CH <sub>4</sub> +Urea-R2 | 1081                                      | 688.8                    | 392.4 (36.3%)                                | 1373 (76.3%)                                         | 339.6 (18.9%)                                     | 95.2%           |
| <sup>13</sup> C-CH <sub>4</sub> +Urea-R3 | 1030                                      | 746.3                    | 283.9 (27.6%)                                | 994 (55.9%)                                          | 372.4 (20.69%)                                    | 76.6%           |
| Average                                  | 1074±41.1                                 | 722.0±29.8               | 352.3±59.5<br>(32.7%±4.54%)                  | 1234±208.4<br>(68.7%±11.2%)                          | 358.7±17.1<br>(19.9%±0.93%)                       | 88.7±10.5%      |

24 <sup>a</sup>The designation of R1 to R3 represents incubation of triplicate microcosms.

25 <sup>b</sup>The amount of CH<sub>4</sub> consumed was calculated as the net difference in CH<sub>4</sub> concentration between day 0 and day 19. The amount of CO<sub>2</sub> produced was estimated in  
 26 a similar way. Assuming that all CH<sub>4</sub> consumed were converted to CO<sub>2</sub>, the amount of CO<sub>2</sub> assimilated by methanotrophs could be calculated as the net difference  
 27 between the consumed CH<sub>4</sub> and the produced CO<sub>2</sub> at day 19 as previously described (Whalen et al., 1990).

28 <sup>c</sup>For every mole of assimilated carbon 0.25 moles of nitrogen have to be taken up (Bodelier and Laanbroek, 2004).



29 **Figure S1.** Methane consumption in soil microcosms over an incubation period of 19 days. Methane consumption is expressed as the percentage  
 30 of the methane concentrations left in the headspace of the microcosms relative to the initial methane concentration in the microcosms in the  
 31 absence (a) and presence (b) of urea nitrogen. The numbers above the columns denote the initial concentration (ppmv) immediately after the  
 32 methane additions.

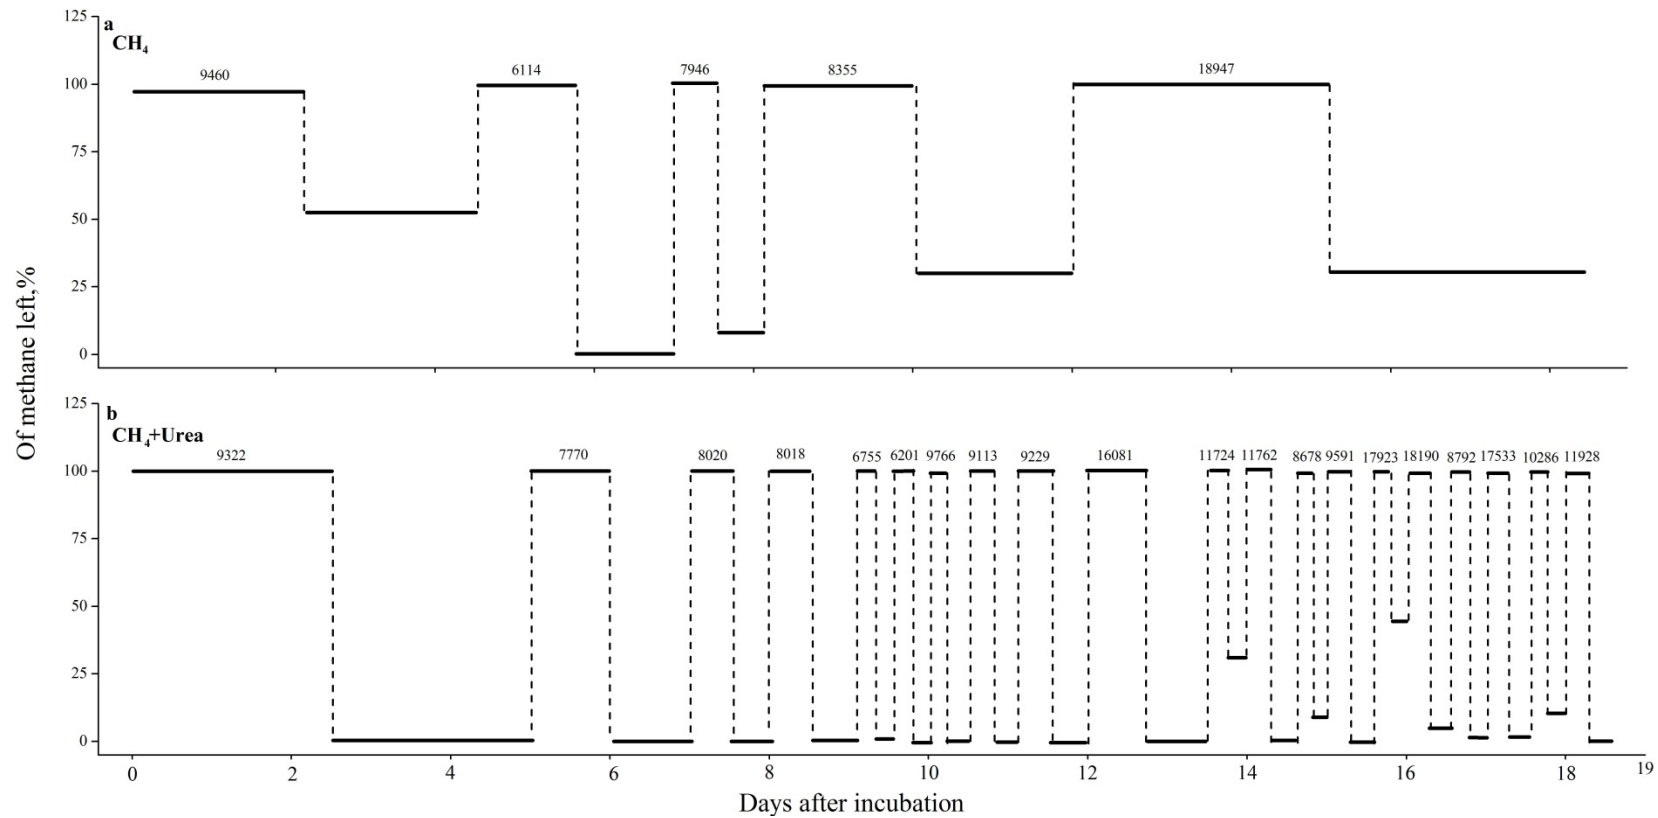

33

34 **Figure S2.** Changes in  $\text{NH}_4^+$ -N and  $\text{NO}_3^-$ -N content in soil microcosms incubated  
 35 with urea or  $\text{CH}_4$ +Urea over the course of 19 days of incubation. The error bars  
 36 represent standard deviation of the triplicate microcosms, while for the soil  
 37 microcosms of  $\text{CH}_4$ +Urea treatment 6 replicates were used including both  $^{12}\text{C}$ -control  
 38 and  $^{13}\text{C}$ -labeled treatments.

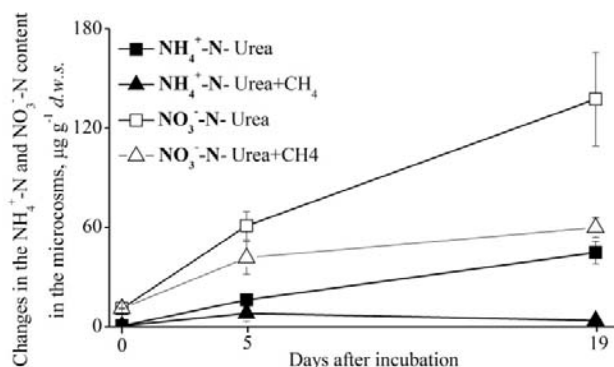

39

40 **Figure S3.** Quantitative distribution of *pmoA* gene copy numbers (a), *amoA* gene  
 41 copy numbers of Bacteria (b) and Archaea (c) in total DNA from microcosms after  
 42 incubation for 5 and 19 days. The error bars represent standard deviations of the  
 43 triplicate microcosms. The different letters above the columns indicate a significant  
 44 difference ( $P < 0.05$ ) using analysis of variance.

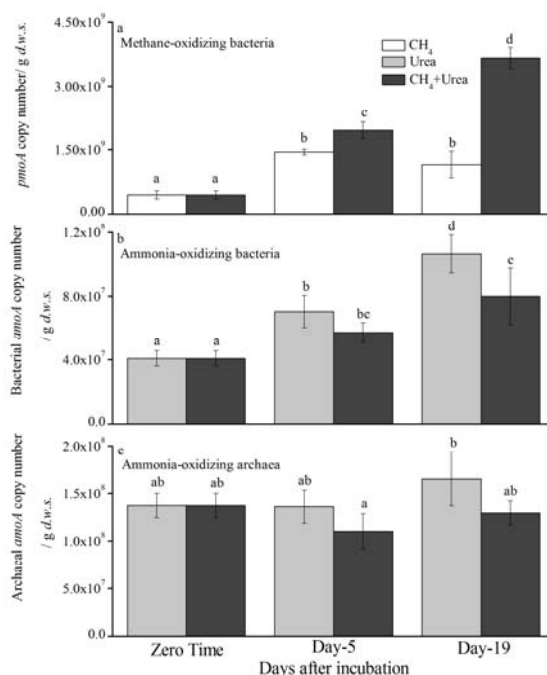

45

46 **Figure S4.** The effect of methane on ammonia-oxidizing archaea (AOA) in soil  
47 microcosms incubated for 19 days. The relative frequency is expressed as the  
48 percentage of the targeted reads to the total 16S rRNA gene sequences reads in soil  
49 sample. The error bars represent standard deviation of the triplicate microcosms,  
50 while for the soil microcosms of CH<sub>4</sub>+Urea treatment 6 replicates were used  
51 including both <sup>12</sup>C-control and <sup>13</sup>C-labeled treatments. The different letters above the  
52 columns indicate a significant difference (*P*<0.05) using analysis of variance.

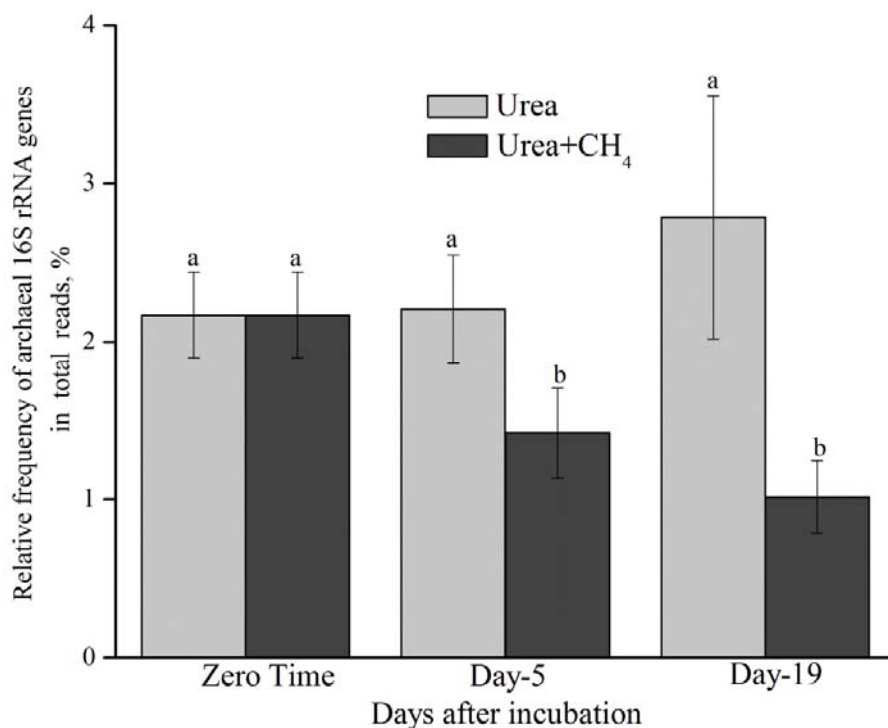

53

54 **Figure S5.** Phylogenetic tree showing the relationship of methane-oxidizing bacterial  
 55 16S rRNA gene (a) and *pmoA* gene (b) sequences in soil microcosms to those  
 56 deposited in the GenBank. Pyrosequencing reads of methanotrophic 16S rRNA genes  
 57 and *pmoA* genes were used from triplicate microcosms at day 0 and day 19, and  
 58 representative sequences were chosen for analysis. The designation of  
 59 CH<sub>4</sub>+Urea-OTU-1-38.5%-(616) indicates that OTU-1 containing 616 sequences with  
 60 identity of >97% comprised 38.5% of methanotrophic 16S rRNA gene sequences in  
 61 <sup>13</sup>C-CH<sub>4</sub>+Urea treatment after incubation for 19 days. CH<sub>4</sub>-OTU-1-69.8%-(3844)  
 62 indicates that OTU-1 containing 3844 sequences with identity of >87% comprised  
 63 69.8% of *pmoA* gene sequences in <sup>13</sup>C-CH<sub>4</sub> treatment after incubation for 19 days.  
 64 One representative sequence was extracted using mothur software package for tree  
 65 construction. The scale bar represents nucleotide acid substitution percentage.

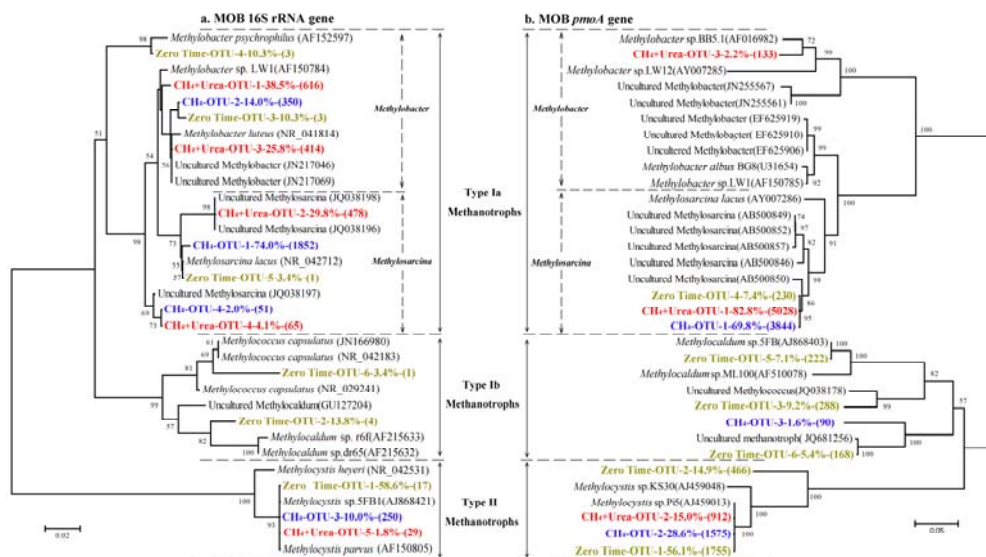

66

67 **Figure S6.** Phylogenetic tree showing the relationship of ammonia-oxidizing bacterial  
 68 16S rRNA gene (a) and *amoA* gene (b) sequences in soil microcosms to those  
 69 deposited in the GenBank. Pyrosequencing reads of AOB 16S rRNA genes and *amoA*  
 70 genes were used from triplicate microcosms at day 0 and day 19. As for 16S rRNA  
 71 genes, all AOB sequence reads were retrieved for analysis using mother software  
 72 package, and only representative *amoA* gene reads were included for clarity to  
 73 construct phylogenetic tree. The designation of Urea+CH<sub>4</sub>-OTU-1-52.3%-(2326)  
 74 indicates that OTU-1 containing 2326 sequences with identity of >97% comprised  
 75 52.3% of ammonia-oxidizing bacterial *amoA* gene sequences in <sup>13</sup>C-Urea+CH<sub>4</sub>  
 76 treatment after incubation for 19 days, and one representative sequence was extracted  
 77 using mothur software package for tree construction. The scale bar represents  
 78 nucleotide acid substitution percentage.

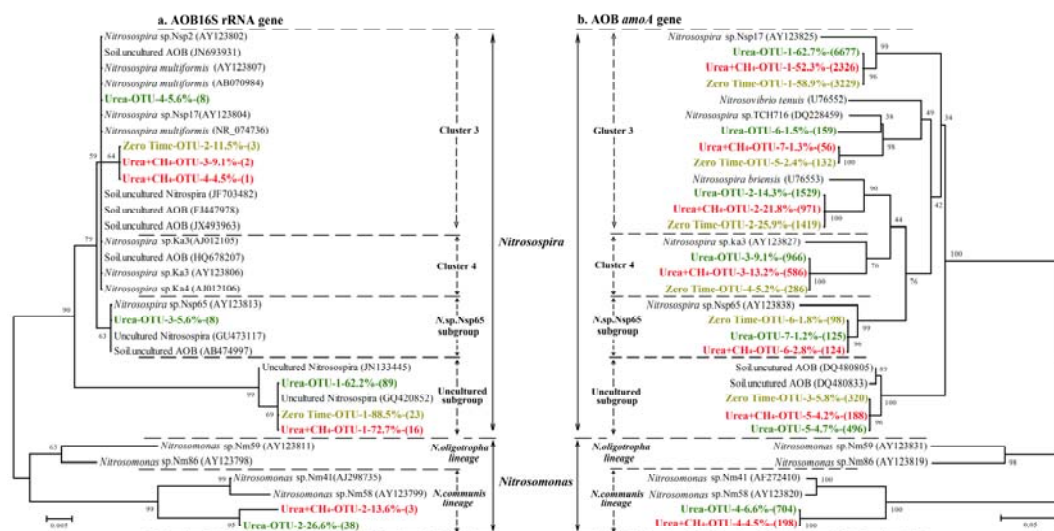

80 **Figure S7.** Quantitative distribution of *pmoA* gene copy numbers (a,b), *amoA* gene  
 81 copy numbers of *Bacteria* (c,d) and *Archaea* (e,f) across the entire buoyant density  
 82 gradient of the fractionated DNA from SIP microcosms after incubation for 5 and 19  
 83 days. The normalized data are the ratio of gene copy number in each DNA gradient  
 84 fraction to the maximum quantities for each treatment. The error bars represent  
 85 standard deviations of the duplicate microcosms.

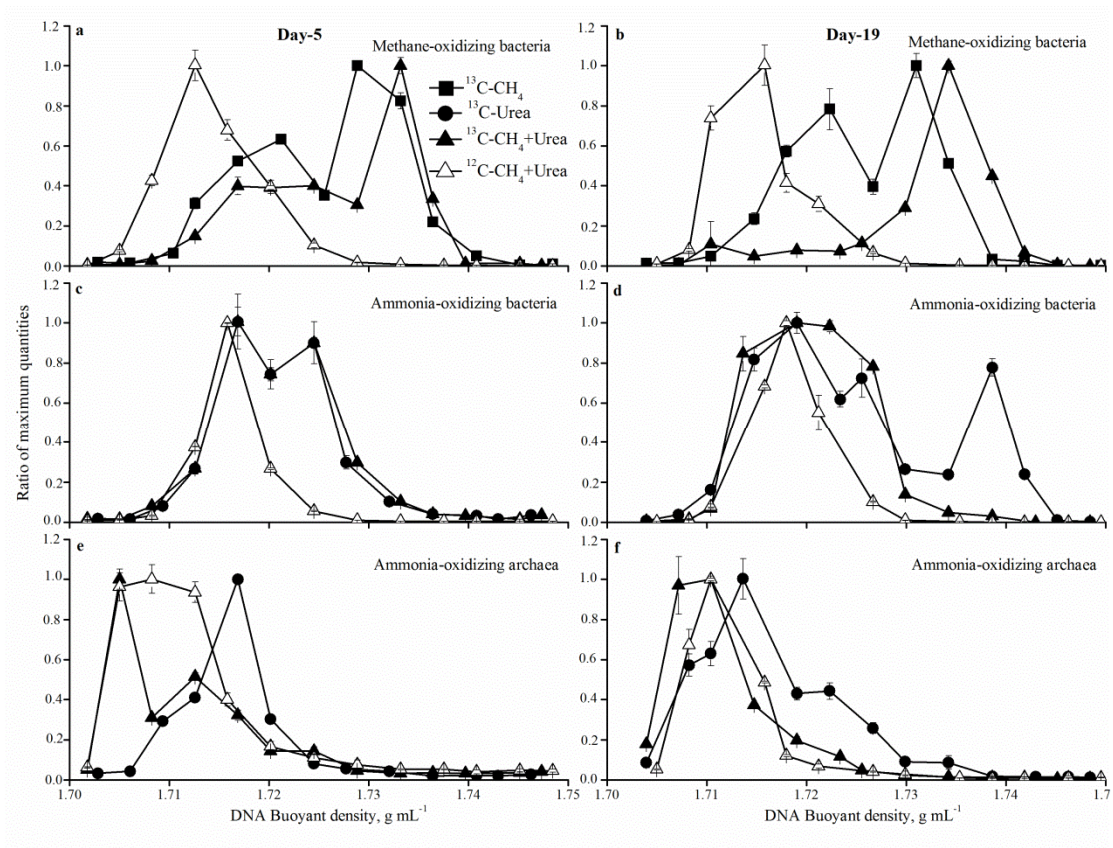

86

87 **Figure S8.** Relative frequency of the archaeal 16S rRNA gene sequences reads in DNA gradient fractions with a buoyant density gradient  
88 isolated from SIP microcosms after incubation for 5 and 19 days. The frequency is expressed as the percentage of the targeted archaeal reads to  
89 the total 16S rRNA gene sequences reads in each DNA gradient fraction.

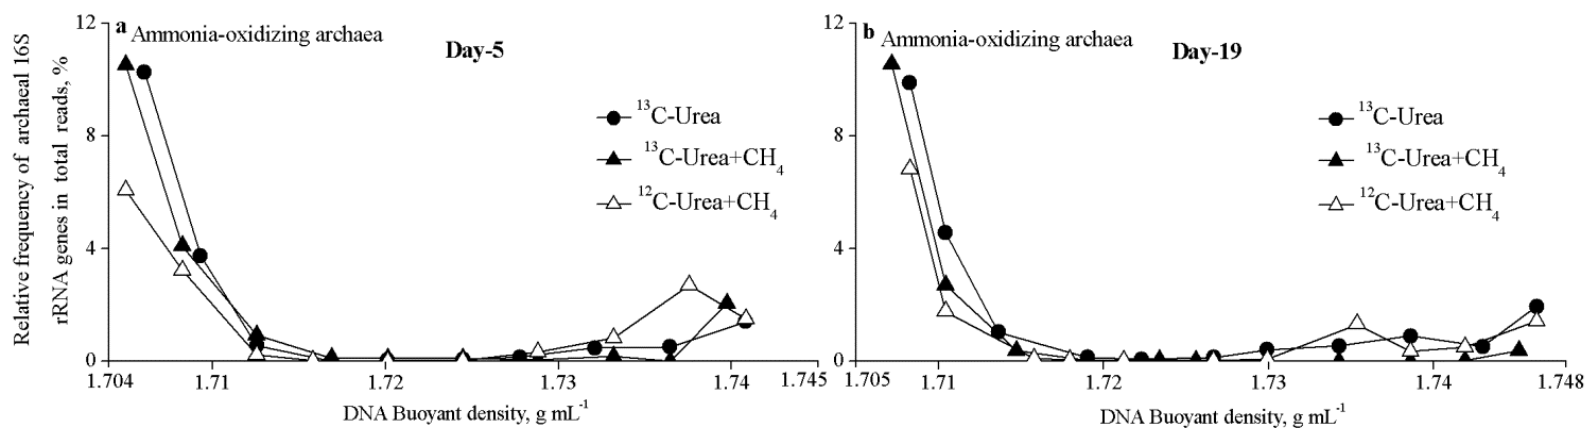

90

91

92

93 **Reference**

- 94 Bodelier P. L. E. and Laanbroek, H. J.: Nitrogen as a regulatory factor of methane oxidation in soils and  
95 sediments, *FEMS Microbiol. Ecol.*, 47, 265-277, 2004.
- 96 Costello, A. M. and Lidstrom, M. E.: Molecular characterization of functional and phylogenetic genes  
97 from natural populations of methanotrophs in lake sediments, *Appl. Environ. Microb.*, 65,  
98 5066-5074, 1999.
- 99 Francis, C. A., Roberts, K. J., Beman, J. M., Santoro, A. E., and Oakley, B. B.: Ubiquity and diversity  
100 of ammonia-oxidizing archaea in water columns and sediments of the ocean, *P. Natl. Acad. Sci. USA*,  
101 102, 14683-14688, 2005.
- 102 Holmes, A. J., Costello, A., Lidstrom, M. E., and Murrell, J. C.: Evidence that particulate methane  
103 monooxygenase and ammonia monooxygenase may be evolutionarily related, *FEMS Microbiol. Lett.*,  
104 132, 203-208, 1995.
- 105 Rotthauwe, J. H., Witzel, K. P., and Liesack, W.: The ammonia monooxygenase structural gene amoA  
106 as a functional marker: Molecular fine-scale analysis of natural ammonia-oxidizing populations,  
107 *Appl. Environ. Microb.*, 63, 4704-4712, 1997.
- 108 Whalen, S. C., Reeburgh, W. S., and Sandbeck, K. A.: Rapid Methane Oxidation in a Landfill Cover  
109 Soil, *Appl. Environ. Microb.*, 56, 3405-3411, 1990.
- 110 Xia, W., Zhang, C., Zeng, X., Feng, Y., Weng, J., Lin, X., Zhu, J., Xiong, Z., Xu, J., Cai, Z., and Jia, Z.:  
111 Autotrophic growth of nitrifying community in an agricultural soil, *ISME J.*, 5, 1226-1236, 2011.
